# Supplementary material for: Behavior Change Techniques Implemented in Electronic Lifestyle Activity Monitors: A Systematic Content Analysis
Source: PubMed Central journal article supplement (PMC4147713; doi:10.2196/jmir.3469), 2014-08-15
Supplement: jmir_v16i8e192_app3.pdf [file jmir_v16i8e192_app3.pdf]

**Multimedia Appendix 3.** Potentially effective techniques by monitor system.

| BCT                                        | Basis | Bodymedia | Fitbit | Fitbug | Grube | Ibitz | Jawbone | Lumo | Misfit | Nike | Polar | Striiv | Withings |
|--------------------------------------------|-------|-----------|--------|--------|-------|-------|---------|------|--------|------|-------|--------|----------|
| Goal setting (behavior)                    |       |           |        |        |       |       |         |      |        |      |       |        |          |
| Problem solving                            |       |           |        |        |       |       |         |      |        |      |       |        |          |
| Goal setting (outcome)                     |       |           |        |        |       |       |         |      |        |      |       |        |          |
| Action planning                            |       |           |        |        |       |       |         |      |        |      |       |        |          |
| Review behavior goal(s)                    |       |           |        |        |       |       |         |      |        |      |       |        |          |
| Commitment                                 |       |           |        |        |       |       |         |      |        |      |       |        |          |
| Feedback on behavior                       |       |           |        |        |       |       |         |      |        |      |       |        |          |
| Self-monitoring of behavior                |       |           |        |        |       |       |         |      |        |      |       |        |          |
| Social support (any kind)                  |       |           |        |        |       |       |         |      |        |      |       |        |          |
| Instruction on how to perform the behavior |       |           |        |        |       |       |         |      |        |      |       |        |          |
| Information about consequences             |       |           |        |        |       |       |         |      |        |      |       |        |          |
| Social comparison                          |       |           |        |        |       |       |         |      |        |      |       |        |          |
| Behavioral practice/rehearsal              |       |           |        |        |       |       |         |      |        |      |       |        |          |
| Rewards (any kind)                         |       |           |        |        |       |       |         |      |        |      |       |        |          |
| Total                                      | 6     | 7         | 8      | 6      | 5     | 8     | 13      | 7    | 8      | 9    | 6     | 9      | 9        |
